# Supplementary material for: Directed evolution of P-glycoprotein cysteines reveals site-specific, non-conservative substitutions that preserve multidrug resistance
Source: PubMed Central journal article supplement (PMC4069687; doi:10.1042/bsr20140062), 2014-06-25
Supplement: bsr034e116add.pdf [file bsr034e116add.pdf]

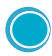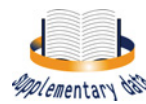

OPEN ACCESS

## SUPPLEMENTARY DATA

# Directed evolution of P-glycoprotein cysteines reveals site-specific, non-conservative substitutions that preserve multidrug resistance

Douglas J. SWARTZ\*<sup>†1</sup>, Leo MOK\*<sup>†1</sup>, Sri K. BOTTA\*<sup>†</sup>, Anukriti SINGH\*<sup>†</sup>, Guillermo A. ALTENBERG<sup>†‡</sup> and Ina L. URBATSCH\*<sup>†2</sup>

\*Department of Cell Biology and Biochemistry, Texas Tech University Health Sciences Center, Lubbock, Texas, U.S.A.

<sup>†</sup>Center for Membrane Protein Research, Texas Tech University Health Sciences Center, Lubbock, Texas, U.S.A.

<sup>‡</sup>Department of Cell Physiology and Molecular Biophysics, Texas Tech University Health Sciences Center, Lubbock, Texas, U.S.A.

## Table S1 Oligonucleotide sequences used for site-saturation mutagenesis and site-directed mutagenesis of single TM Cys mutants

Only the forward mutagenic primer sequences are shown. Reverse primer sequences are identical but complimentary to the forward primer.

| Primer name       | Sequence (5' to 3')                                 |
|-------------------|-----------------------------------------------------|
| Mutagenic primers |                                                     |
| C427-NNN          | CGGAAATCTGGTNNNGCAAGTCCAC                           |
| C638-NNN          | GGAAATGAGGCTNNNAAGTCTAAGGACGAG                      |
| C669-NNN          | CACTAGAAAGTCCATTNNNGTCCACACGATC                     |
| C1070-NNN         | GGTTCTCCGGTNNNGCAAGTCCACTG                          |
| C1121-NNN         | CTATTCTTTTCGACNNNAGCATTGCAGAG                       |
| C1223-NNN         | CCAGAGAAGGAAGAAGTNNNATCGTCATTGCTC                   |
| C133A             | TCCTTCTGGGCCCTGGCCGCTGGAAGACAAATCCACAAGATTAGACAGAAG |
| C713A             | GGTATCTTCGCTGCCATCATAACGGTGGTTTGCAGCCAGCTTTTCTGTG   |
| C952A             | TACGCTGCCGATTGAGATTCGGTGCTTATTGGTGACTCAGCAATTGATG   |
| Flanking primers  |                                                     |
| NBD1/linker       | CCTTGTTCTTTTCTGCACAA (Forward)                      |
|                   | CTGTCTTTGGTTTCTGGTGGACCACC (Reverse)                |
| NBD2              | CCATACCGTAACGCTATGAAAAGGCTC (Forward)               |
|                   | GAAGTGCAACAACGTATCTACCAACG (Reverse)                |

<sup>1</sup> These authors contributed equally to this work.

<sup>2</sup> To whom correspondence should be addressed (email ina.urbatsch@ttuhsc.edu).

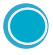**Table S2 Relative frequency of each amino acid found at the nine native Cys positions in closely related Pgp orthologs**

| Position | Cys <sup>133*</sup> | Cys <sup>427</sup> | Cys <sup>638</sup> | Cys <sup>669</sup> | Cys <sup>713</sup> | Cys <sup>952</sup> | Cys <sup>1070</sup> | Cys <sup>1121</sup> | Cys <sup>1223</sup> |
|----------|---------------------|--------------------|--------------------|--------------------|--------------------|--------------------|---------------------|---------------------|---------------------|
| A        |                     |                    |                    |                    |                    |                    |                     |                     |                     |
| C        | 84                  | 100                | 11                 | 5                  | 98                 | 98                 | 100                 | 96                  | 98                  |
| D        |                     |                    | 34                 |                    |                    |                    |                     |                     |                     |
| E        |                     |                    | 5                  |                    |                    |                    |                     |                     |                     |
| F        |                     |                    |                    |                    |                    |                    |                     | 4                   |                     |
| G        | 2                   |                    | 23                 |                    |                    |                    |                     |                     |                     |
| H        |                     |                    |                    | 23                 |                    |                    |                     |                     |                     |
| I        |                     |                    |                    |                    |                    |                    |                     |                     |                     |
| K        |                     |                    |                    | 16                 |                    |                    |                     |                     |                     |
| L        | 2                   |                    |                    |                    |                    |                    |                     |                     |                     |
| M        |                     |                    |                    |                    |                    |                    |                     |                     |                     |
| N        |                     |                    | 7                  |                    |                    |                    |                     |                     |                     |
| P        |                     |                    |                    |                    |                    |                    |                     |                     |                     |
| Q        |                     |                    |                    | 2                  |                    |                    |                     |                     |                     |
| R        |                     |                    |                    | 49                 |                    |                    |                     |                     | 2                   |
| S        |                     |                    | 14                 | 2                  | 2                  | 2                  |                     |                     |                     |
| T        | 11                  |                    |                    | 2                  |                    |                    |                     |                     |                     |
| V        |                     |                    |                    |                    |                    |                    |                     |                     |                     |
| W        |                     |                    |                    |                    |                    |                    |                     |                     |                     |
| Y        |                     |                    | 7                  |                    |                    |                    |                     |                     |                     |
| Total%   | 100                 | 100                | 100                | 100                | 100                | 100                | 100                 | 100                 | 100                 |

\*Human and mouse Pgp were aligned with 46 closest related orthologs ( $\geq 70\%$  sequence identity) from the Ensembl database. The relative frequency (%) of amino acids found at each Cys position is shown.

Received 15 April 2014/5 May 2014; accepted 6 May 2014

Published as Immediate Publication 14 May 2014, doi 10.1042/BSR20140062
